# Supplementary material for: Root transcriptomic responses of grafted grapevines to heterogeneous nitrogen availability depend on rootstock genotype
Source: PubMed Central journal article supplement (PMC5854021; doi:10.1093/jxb/erx224), 2017-07-11
Supplement: erx224_suppl_supplementary_figures.pdf [file erx224_suppl_supplementary_figures.pdf]

**Title:**

Root transcriptomic responses of grafted grapevine to heterogeneous N availability depend on rootstock genotype

**Authors:**

Noé Cochetel, Frédéric Escudié, Sarah Jane Cookson, Zhanwu Dai, Philippe Vivin, Pierre-François Bert, Mindy Stephania Muñoz, Serge Delrot, Christophe Klopp, Nathalie Ollat, Virginie Lauvergeat

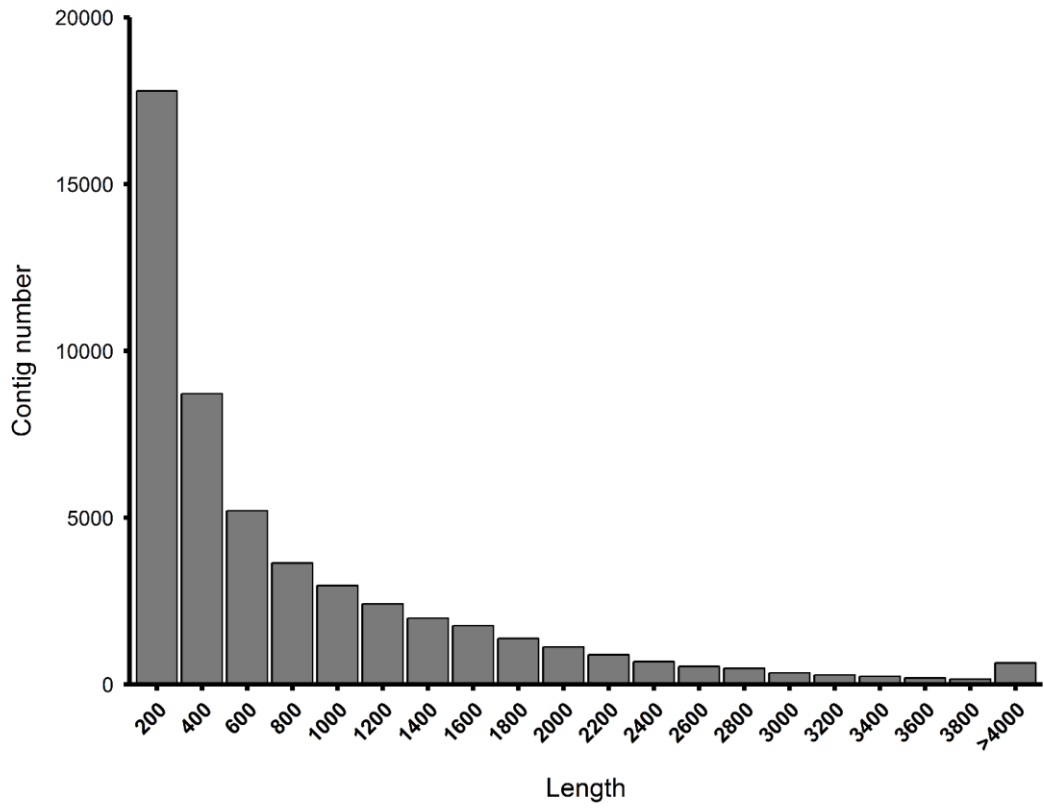

**Supplementary Figure S1.** *Length distribution of de novo assembled contigs*

Values are comprised between 201 and 15,529 bp; and contigs from 201 to 599 bp represent half of the whole transcriptome.

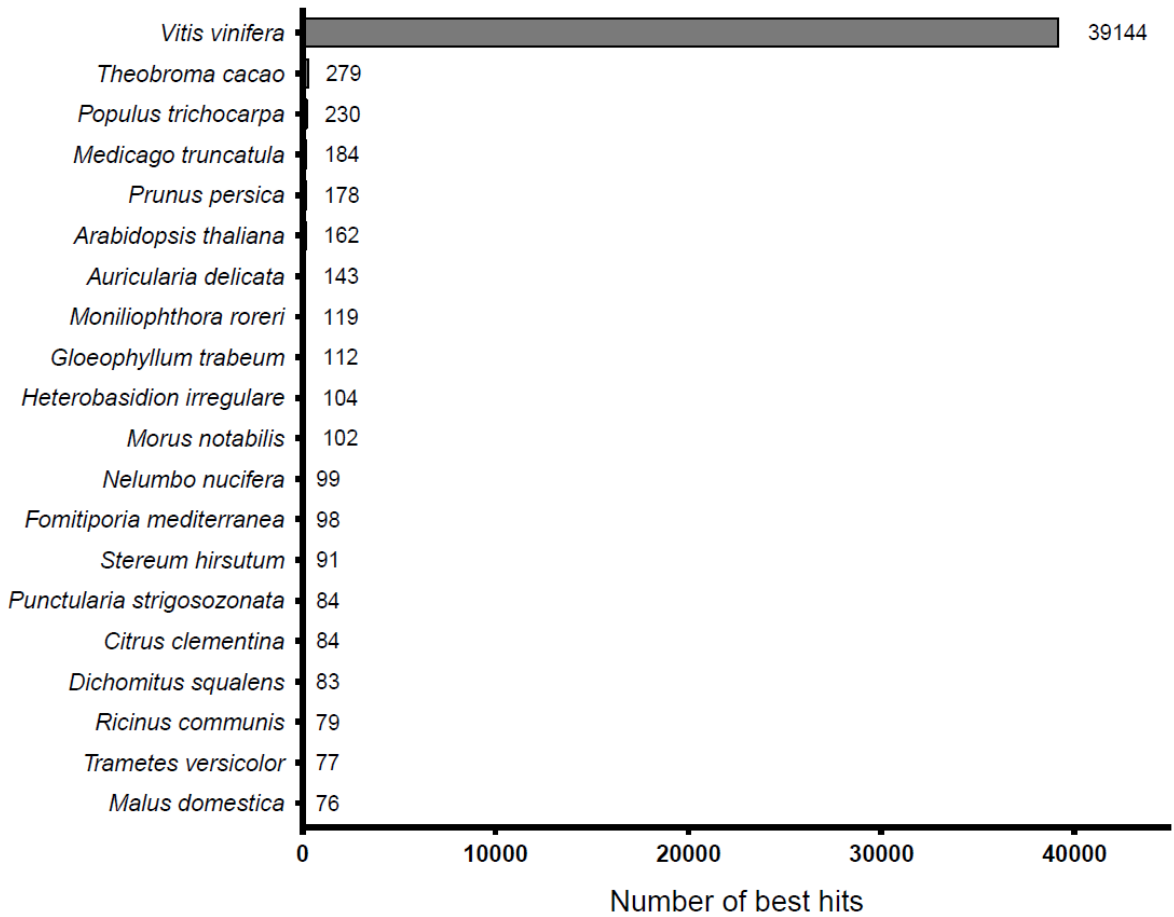

**Supplementary Figure S2.** *Top-hit species distribution of the merged final transcriptome*  
 The 20 most represented species in the transcriptome annotation are presented.

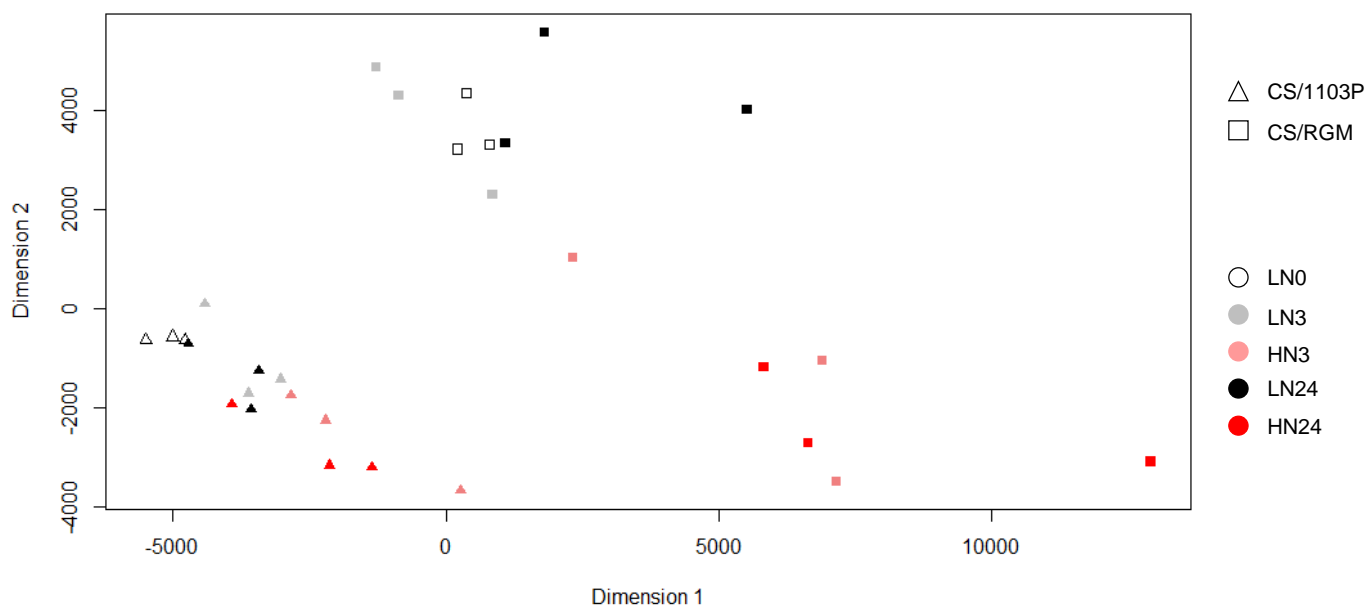

**Supplementary Figure S3.** *Multi-Dimensional Scaling plot of counts data from the different RNAseq samples*

Each condition is represented by three biological replicates with different colors for each time and N treatment. The combination CS/1103P is indicated using triangles and CS/RGM using squares.

**A**

| Bin     | BinName                                                                   | Contingency      | Pvalue   | Adj.Pvalue (Bonf.) |
|---------|---------------------------------------------------------------------------|------------------|----------|--------------------|
| 17      | hormone metabolism                                                        | 29 913 183 50125 | 5.56E-17 | 5.95E-15           |
| 17.5    | hormone metabolism.ethylene                                               | 24 150 188 50888 | 1.75E-29 | 1.87E-27           |
| 17.5.2  | hormone metabolism.ethylene.signal transduction                           | 24 56 188 50982  | 2.18E-38 | 2.33E-36           |
| 12      | N-metabolism                                                              | 6 49 206 50989   | 1.14E-07 | 1.22E-05           |
| 12.1    | N-metabolism.nitrate metabolism                                           | 3 1 209 51037    | 2.78E-07 | 2.98E-05           |
| 12.1.2  | N-metabolism.nitrate metabolism.nitrite reductase                         | 2 0 210 51038    | 1.70E-05 | 1.82E-03           |
| 7       | OPP                                                                       | 9 50 203 50988   | 3.14E-12 | 3.36E-10           |
| 7.3     | OPP.electron transfer                                                     | 6 6 206 51032    | 4.22E-12 | 4.52E-10           |
| 7.1.1   | OPP.oxidative PP.G6PD                                                     | 3 12 209 51026   | 3.06E-05 | 3.28E-03           |
| 27.3.5  | RNA.regulation of transcription.ARR                                       | 7 23 205 51015   | 3.52E-11 | 3.77E-09           |
| 27.3.20 | RNA.regulation of transcription.G2-like transcription factor family. GARP | 4 49 208 50989   | 7.11E-05 | 7.61E-03           |
| 19      | tetrapyrrole synthesis                                                    | 5 61 207 50977   | 8.41E-06 | 9.00E-04           |
| 19.3    | tetrapyrrole synthesis.uroporphyrin-III C-methyltransferase               | 5 0 207 51038    | 1.16E-12 | 1.24E-10           |
| 34.4    | transport.nitrate                                                         | 8 14 204 51024   | 2.28E-14 | 2.44E-12           |

**B**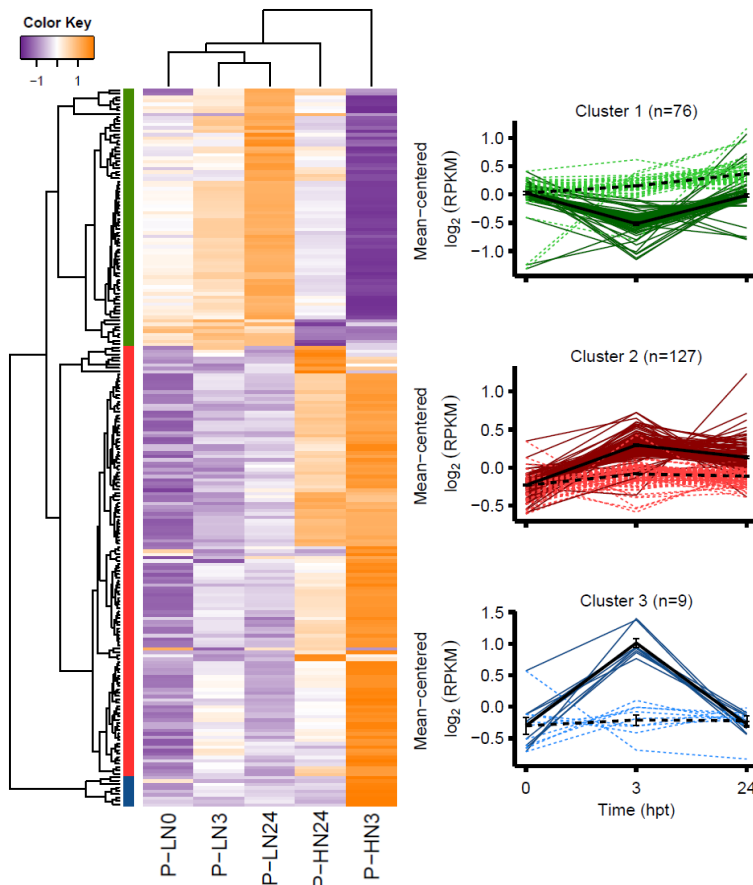

**Supplementary Figure S4.** The few number of DEGs responding to N availability in CS/1103P involves mainly N-related genes

A) Enrichment analysis of the DEGs from CS/1103P (n=212). Contingency gives the number of genes (i) in the BIN in the input list, (ii) in the background, (iii) not in the BIN in input list, and (iv) not in the background. *P*-values were adjusted with Bonferroni. Values were filtered with an adjusted *P*-value threshold <0.01 and an enrichment >1. B) Hierarchical clustering of the transcripts and the different conditions (*i.e.* Treatment x Harvesting time) in a heatmap presenting the expression pattern of each DEGs (rows) within the different samples (columns). The harvesting time 0 hpt was excluded during the hierarchical clustering process. Expression values are RPKM  $\log_2$ -transformed with up-regulation to down-regulation varying from orange to purple colour. Transcript clusters were extracted using the gene hierarchical clustering tree. The x-axis represents the harvesting time (in hpt), y-axis represents the mean-centered RPKM  $\log_2$ -transformed values. HN and LN conditions were drawn in dark coloured solid and light coloured dashed lines, respectively. Mean  $\pm$  SE was represented in black colour.

A

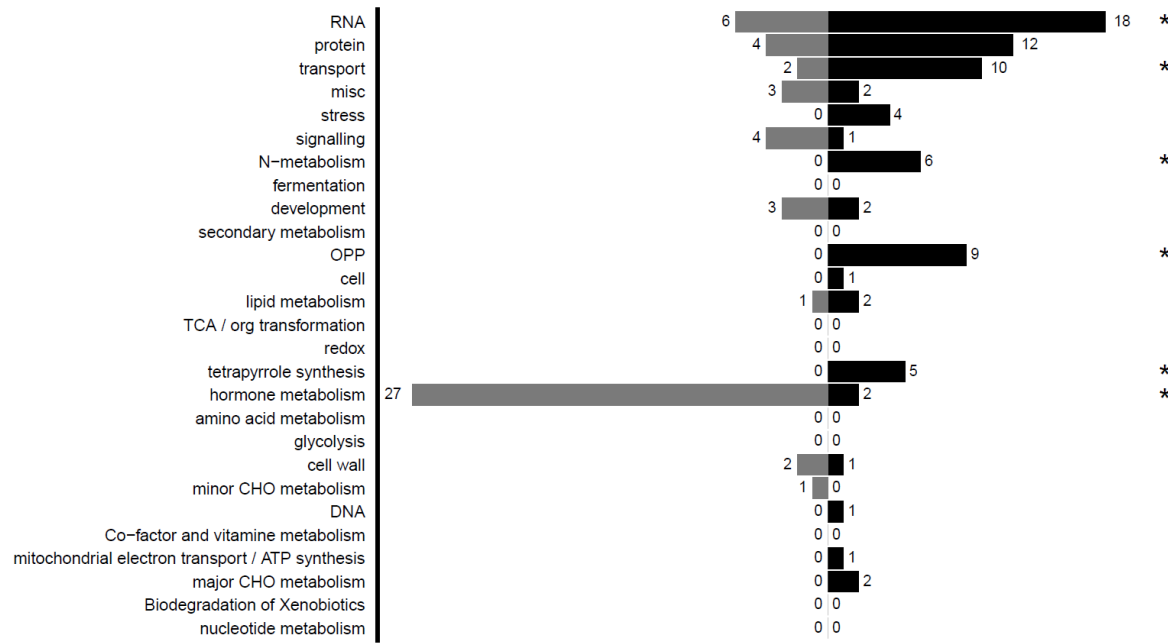

B

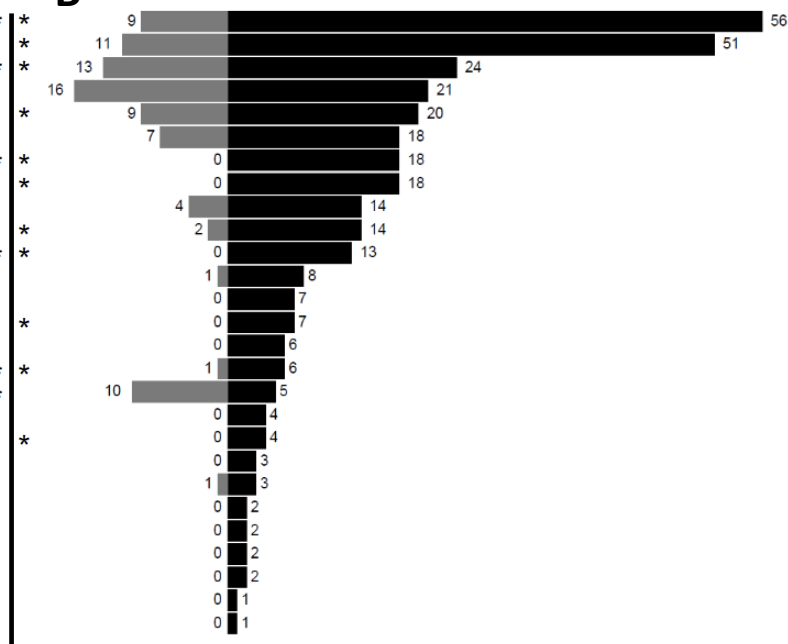

C

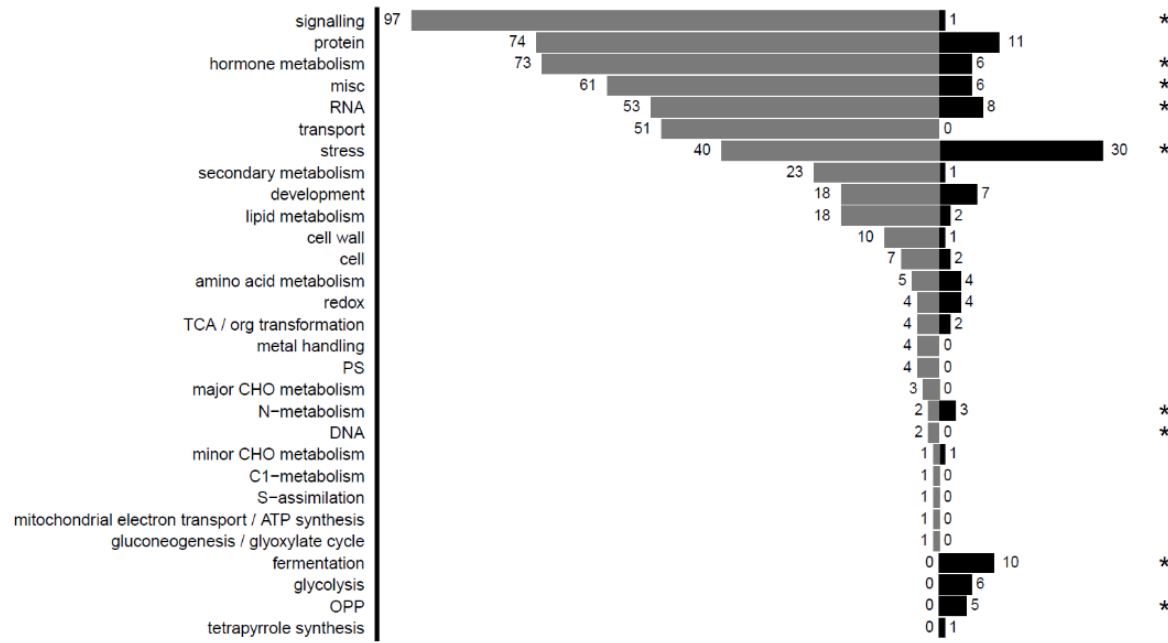

### Supplementary Figure S5. Functional categories distribution within DEGs

Histograms show the functional categories attributed to DEGs from contrasts between HN and LN-irrigated roots at 3 hpt in CS/1103P (A), CS/RGM (B) and at 24 hpt in CS/RGM only (C). Asterisks represent significant enrichment resulting of a mefisto analysis with an adjusted  $P$ -value (Bonferroni)  $< 0.01$ . Up and down-regulated genes were represented in black and grey colors, respectively.

| Sample       | Name     | Raw reads | Cleaned reads | Filtered (%) |
|--------------|----------|-----------|---------------|--------------|
| PFB-56_20_S2 | P-LN0.1  | 44022375  | 43367351      | 1.49         |
| PFB-57_6_S1  | P-LN0.2  | 38152919  | 37876907      | 0.72         |
| PFB-58_12_S1 | P-LN0.3  | 33703044  | 33450549      | 0.75         |
| PFB-29_22_S1 | P-LN3.1  | 42601769  | 41923422      | 1.59         |
| PFB-31_11_S2 | P-LN3.2  | 32059193  | 31565788      | 1.54         |
| PFB-36_25_S2 | P-LN3.3  | 36641969  | 36073755      | 1.55         |
| PFB-30_10_S1 | P-HN3.1  | 42260609  | 41587058      | 1.59         |
| PFB-35_15_S2 | P-HN3.2  | 34314981  | 33797028      | 1.51         |
| PFB-37_7_S1  | P-HN3.3  | 38166051  | 37489125      | 1.77         |
| PFB-41_1_S1  | P-LN24.1 | 40729211  | 40006233      | 1.78         |
| PFB-43_23_S2 | P-LN24.2 | 40366903  | 39696276      | 1.66         |
| PFB-48_19_S2 | P-LN24.3 | 39746879  | 38920801      | 2.08         |
| PFB-42_13_S1 | P-HN24.1 | 40898469  | 40175340      | 1.77         |
| PFB-47_12_S2 | P-HN24.2 | 42133688  | 41323911      | 1.92         |
| PFB-49_9_S1  | P-HN24.3 | 37070521  | 36641692      | 1.16         |
| PFB-53_2_S1  | R-LN0.1  | 36326877  | 35866299      | 1.27         |
| PFB-54_16_S1 | R-LN0.2  | 47255815  | 46613390      | 1.36         |
| PFB-55_18_S2 | R-LN0.3  | 44216349  | 43660318      | 1.26         |
| PFB-29_22_S1 | R-LN3.1  | 42601769  | 41923422      | 1.59         |
| PFB-31_11_S2 | R-LN3.2  | 32059193  | 31565788      | 1.54         |
| PFB-36_25_S2 | R-LN3.3  | 36641969  | 36073755      | 1.55         |
| PFB-33_3_S1  | R-HN3.1  | 44614433  | 43981469      | 1.42         |
| PFB-38_4_S1  | R-HN3.2  | 38706051  | 38067161      | 1.65         |
| PFB-40_11_S2 | R-HN3.3  | 41161470  | 40505828      | 1.59         |
| PFB-44_7_S2  | R-LN24.1 | 39427555  | 38666683      | 1.93         |
| PFB-46_6_S1  | R-LN24.2 | 44895875  | 43964087      | 2.08         |
| PFB-51_14_S2 | R-LN24.3 | 35281333  | 34863971      | 1.18         |
| PFB-45_5_S1  | R-HN24.1 | 41343213  | 40285076      | 2.56         |
| PFB-50_2_S1  | R-HN24.2 | 52795478  | 52172562      | 1.18         |
| PFB-52_16_S2 | R-HN24.3 | 44618538  | 44012991      | 1.36         |

**Supplementary Table S1.** *Read number before (raw) and after trimming (cleaned)*

The sample names contain a letter depending on each rootstock genotype; P: CS/1103P, R: CS/RGM, followed by HN/LN; HN: High Nitrate solution, LN: Low Nitrate solution; the harvesting time and the number of the replicate are separated by a dot.

| Assembly      | Nb seq | N50  | L50   | Lg sum     | Lg min | Lg lower quartile | Lg mean | Lg median | Lg upper quartile | Lg max | % re-mapping | Nb prot aligned (80%/80%) | Nb contig with prot(s) |
|---------------|--------|------|-------|------------|--------|-------------------|---------|-----------|-------------------|--------|--------------|---------------------------|------------------------|
| oases_rpk01   | 51250  | 1481 | 9820  | 47 519 774 | 201    | 328               | 927.22  | 576       | 1218              | 15529  | 89.73        | 17950                     | 15001                  |
| oases_rpk03   | 44050  | 1594 | 8469  | 43 041 069 | 201    | 324               | 977.10  | 604       | 1330              | 15529  | 89.33        | 17600                     | 14555                  |
| oases_rpk10   | 20853  | 1943 | 4510  | 26 571 035 | 202    | 378               | 1274.21 | 984       | 1799              | 15529  | 83.96        | 13722                     | 10636                  |
| trinity_rpk01 | 71430  | 1253 | 12263 | 53 429 994 | 201    | 269               | 748.00  | 416       | 895               | 15529  | 88.66        | 17458                     | 15086                  |
| trinity_rpk03 | 55962  | 1440 | 9711  | 46 137 723 | 201    | 270               | 824.45  | 445       | 1072              | 15529  | 88.09        | 17068                     | 14484                  |
| trinity_rpk10 | 21431  | 1869 | 4469  | 25 480 402 | 201    | 337               | 1188.95 | 868       | 1697              | 15529  | 81.84        | 13094                     | 10293                  |

**Supplementary Table S2.** *Summary table of the de novo assemblies*

Each assembler, Oases and Trinity, was used with three different RPKM parameters 1; 3 and 10. Nb seq is the total contigs number obtained, N50 is defined as the largest entity E such that at least half of the total size of the entities is contained in entities larger than E and L50 is the number of scaffolds that accounts for more than 50% of the genome assembly. Data on contig length (Lg) include the sum of all contig lengths (Lg sum), the minimum length (Lg min), lower quartile, mean, median, upper quartile and the maximum length (Lg max). Reads were mapped back to the different assemblies using BWA (% re-mapping) (Li and Durbin, 2009). Protein alignment was performed by BLAT (Kent, 2002) and counted if the protein coverage is upper than 80% and/or with an identity upper than 80%. The number of contigs with protein(s) was determined in the same way by counting contigs with one or more protein associated after the filtering process (coverage and/or identity of 80%).



| <b>Accession number</b>  | <b>Gene name</b>              | <b>Function</b>                          | <b>Forward primer (5'-3')</b> | <b>Reverse primer (5'-3')</b> |
|--------------------------|-------------------------------|------------------------------------------|-------------------------------|-------------------------------|
| <i>VIT_05s0020g02480</i> | <i>GS</i>                     | Glutamine synthetase                     | CTGTCTCCCTTGCTCCCTCTC         | GGAGTCACTGGAAATGGGTTGAAC      |
| <i>VIT_18s0001g03910</i> | <i>NR</i>                     | Nitrate reductase                        | GCTGGTGTCTGAATGATGGAG         | AAGACGACGCTAGGAGAGAAG         |
| <i>VIT_03s0063g00370</i> | <i>NIR</i>                    | Nitrite reductase                        | CTTGCCGAGGAAGTGAATGTG         | GCATGTACGCCAGATCATTGATGT      |
| <i>VIT_02s0154g00260</i> | <i>NPF6.3</i>                 | NRT1/PTR Family 6.3                      | CAGTTCCTTATTGGTGGGTGC         | CCCTAATGAAAGTGTGCTCAA         |
| <i>VIT_06s0061g00320</i> | <i>NRT2.4a</i>                | Nitrate transporter 2.4a                 | CCTCCCACCTTCAAAGGA            | CATGGGATGGTGTAGAGTTGG         |
| <i>VIT_08s0040g01500</i> | <i>NRT2.4b</i>                | Nitrate transporter 2.4b                 | AGGTGGGAACCTTCGGATC           | TCTTTGGAGGGCGGTAGC            |
| <i>VIT_17s0000g09470</i> | <i>NRT3</i>                   | Nitrate transporter 3                    | CTTGACATTGCTGCCGTTTG          | GGAAACAGTCATAGTGGCTAACTT      |
| <i>VIT_17s0000g10430</i> | <i>GAPDH</i>                  | Glyceraldehyde-3-Phosphate Dehydrogenase | CCACAGACTTCATCGGTGACA         | TTCTCGTTGAGGGCTATTCCA         |
| <i>VIT_12s0035g01130</i> | <i>EF1<math>\gamma</math></i> | Elongation factor 1 gamma                | CAAGAGAAACCATCCCTAGCTG        | TCAATCTGTCTAGGAAAGGAAG        |

**Supplementary Table S3.** List of the primers used for qPCR experiments
